# Supplementary material for: Improved infrared emissivity modulation of polyaniline based on various metal compound doping strategies
Source: Royal Society of Chemistry journal article supplement (doi:10.1039/d5tc00304k), 2025-01-01
Supplement: d5tc00304k1.pdf [file d5tc00304k1.pdf]

## Supporting Information

### **Improved infrared emissivity modulation of polyaniline based on various metal compound doping strategies**

Yu Zhou,<sup>a</sup> Jinxu Zhao,<sup>b</sup> Xiansheng Li,<sup>c</sup> Bin Zhao,<sup>c</sup> Gang Pei,<sup>\*c</sup> Jianming Zheng,<sup>b</sup> and Chunye Xu<sup>\*a, b</sup>

a. Department of Polymer Science and Engineering, University of Science and Technology of China, Hefei, Anhui, 230026, China.

b. Hefei National Research Center for Physical Sciences at the Microscale, University of Science and Technology of China, Hefei, Anhui, 230026, China.

c. Department of Thermal Science and Energy Engineering, University of Science and Technology of China, Hefei, Anhui, 230027, China.

\* Corresponding author.

E-mail addresses: [peigang@ustc.edu.cn](mailto:peigang@ustc.edu.cn), [chunye@ustc.edu.cn](mailto:chunye@ustc.edu.cn)

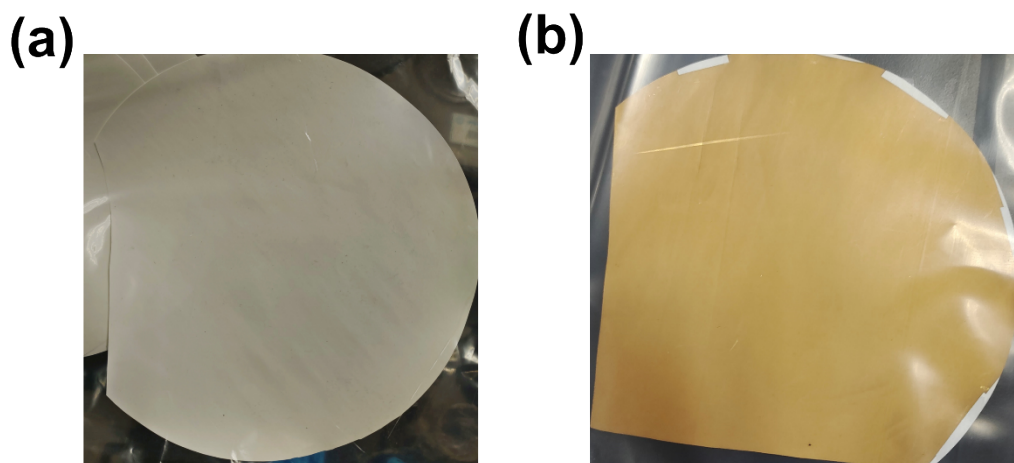

Figure S1. Photographs of porous nylon filter membrane before (a) and after (b) electron beam (e-beam) deposition of gold.

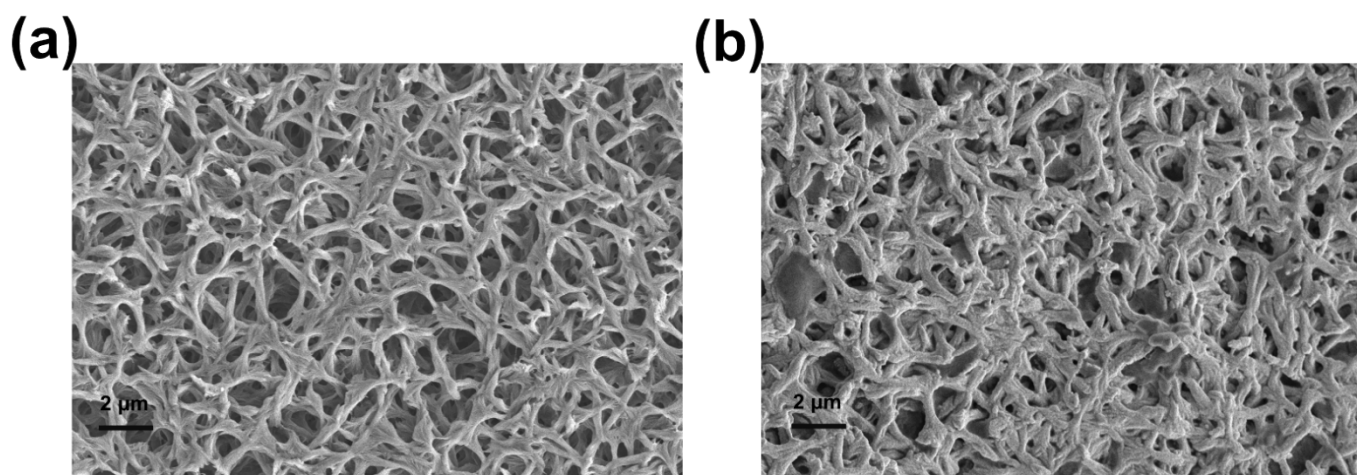

Figure S2. Electron microscope images of porous nylon filter membrane before (a) and after (b) electron beam deposition of gold.

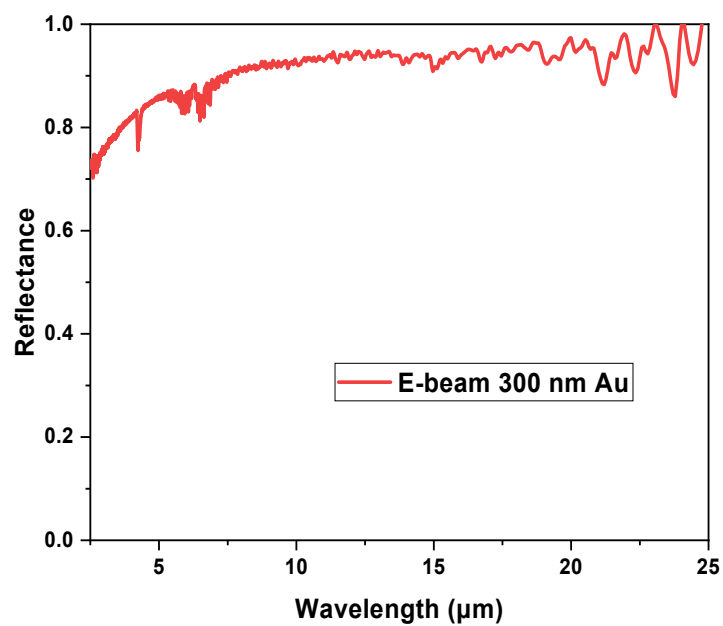

Figure S3. Infrared reflectivity of porous nylon filter membrane after electron beam deposition of gold.

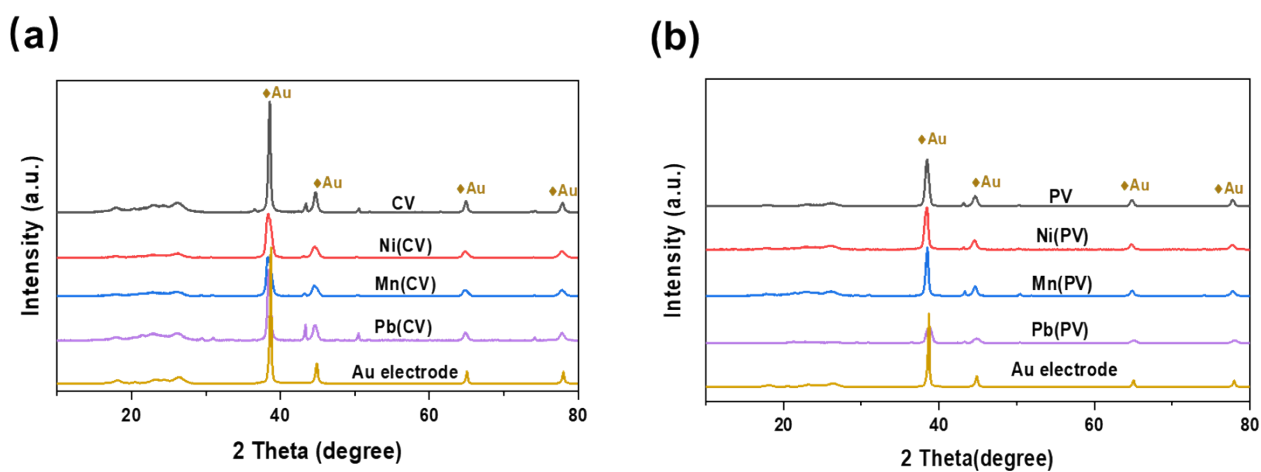

Figure S4. X-ray diffraction analysis of the PANI film before and after doping. Fig. S4a is PANI with CV method and Fig. S4b is PANI with PV method.

**(a)**

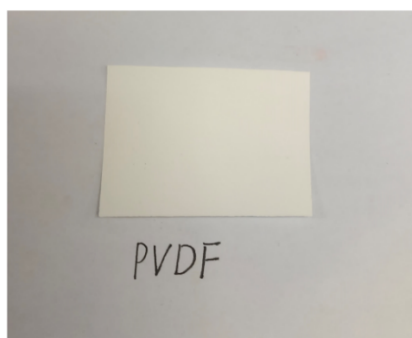

**(b)**

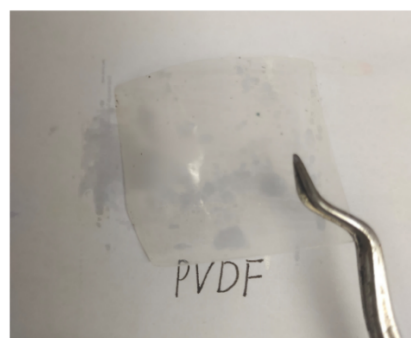

Figure S5. Photographs of pure polyvinylidene difluoride (PVDF) film before and after adsorption of propylene carbonate (PC) electrolyte.
